# Supplementary material
Source: HighWire-hosted journal article supplement (https://www.cmaj.ca/highwire/filestream/69798/field_highwire_adjunct_files/3/170892-res-4-at.pdf)
Supplement: 170892-res-4-at.pdf [file 170892-res-4-at.pdf]

**Appendix 4 (as supplied by the authors): Effect modification by self-reported health, home care nursing visits**

| <b>Patient Group</b> | <b>Outcome</b>         | <b>Self-Reported Health</b> | <b>OR (95% CI)</b> | <b>p-value<sup>1</sup></b> |
|----------------------|------------------------|-----------------------------|--------------------|----------------------------|
| Long Stay            | ED Visit               | Not Poor                    | 1.37 (1.19-1.59)   | 0.3                        |
|                      |                        | Poor                        | 1.20 (0.98-1.46)   |                            |
|                      | ED Visit, Admission    | Not Poor                    | 1.21 (0.97-1.51)   | 0.2                        |
|                      |                        | Poor                        | 0.95 (0.70-1.27)   |                            |
|                      | ED Visit, No Admission | Not Poor                    | 1.57 (1.30-1.91)   | 0.7                        |
|                      |                        | Poor                        | 1.46 (1.12-1.91)   |                            |
|                      | ED Visit, CTAS 1-3     | Not Poor                    | 1.31 (1.12-1.53)   | 0.4                        |
|                      |                        | Poor                        | 1.17 (0.94-1.44)   |                            |
|                      | ED Visit, CTAS 4-5     | Not Poor                    | 1.73 (1.17-2.57)   | 0.5                        |
|                      |                        | Poor                        | 1.35 (0.77-2.37)   |                            |
| Short Stay           | ED Visit               | Not Poor                    | 1.22 (1.05-1.41)   | 0.7                        |
|                      |                        | Poor                        | 1.13 (0.80-1.60)   |                            |
|                      | ED Visit, Admission    | Not Poor                    | 1.16 (0.88-1.53)   | 0.2                        |
|                      |                        | Poor                        | 0.81 (0.48-1.36)   |                            |
|                      | ED Visit, No Admission | Not Poor                    | 1.23 (1.03-1.47)   | 0.2                        |
|                      |                        | Poor                        | 1.65 (1.05-2.61)   |                            |
|                      | ED Visit, CTAS 1-3     | Not Poor                    | 1.25 (1.06-1.47)   | 0.4                        |
|                      |                        | Poor                        | 1.04 (0.71-1.50)   |                            |
|                      | ED Visit, CTAS 4-5     | Not Poor                    | 1.15 (0.85-1.57)   | 0.3                        |
|                      |                        | Poor                        | 2.02 (0.80-5.07)   |                            |

<sup>1</sup> p-value of interaction term in conditional logistic regression model
